# Supplementary material for: Grafting of paired 3-aminopropyltrialkoxy silanes onto mesoporous silica and adsorptions of isomers of benzenedialdehydes
Source: Royal Society of Chemistry journal article supplement (doi:10.1039/c3cp44592e), 2013-01-01
Supplement: c3cp44592e.pdf [file c3cp44592e.pdf]

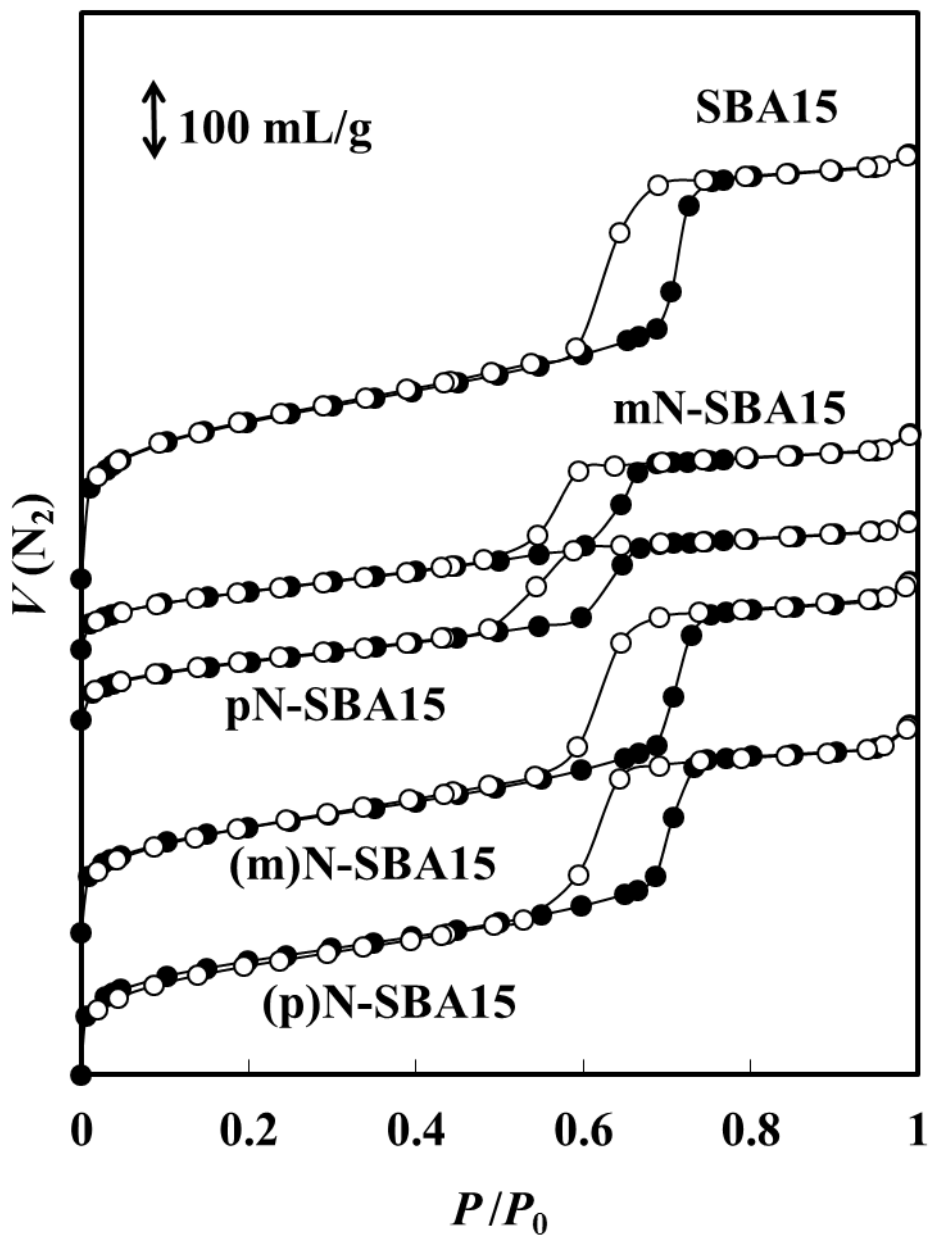

**Fig. S1** Nitrogen desorption isotherms of SBA-15, mN-SBA-15, pN-SBA-15, (m)N-SBA-15 and (p)N-SBA-15. The offset in the adsorptions are indicated at  $P/P_0 = 0$ . The adsorption isotherms, which are identical to those in Fig. 1, are also shown for comparison.
