# Supplementary material for: Grafting of paired 3-aminopropyltrialkoxy silanes onto mesoporous silica and adsorptions of isomers of benzenedialdehydes
Source: Royal Society of Chemistry journal article supplement (doi:10.1039/c3cp44592e), 2013-01-01
Supplement: c3cp44592e_2.pdf [file c3cp44592e_2.pdf]

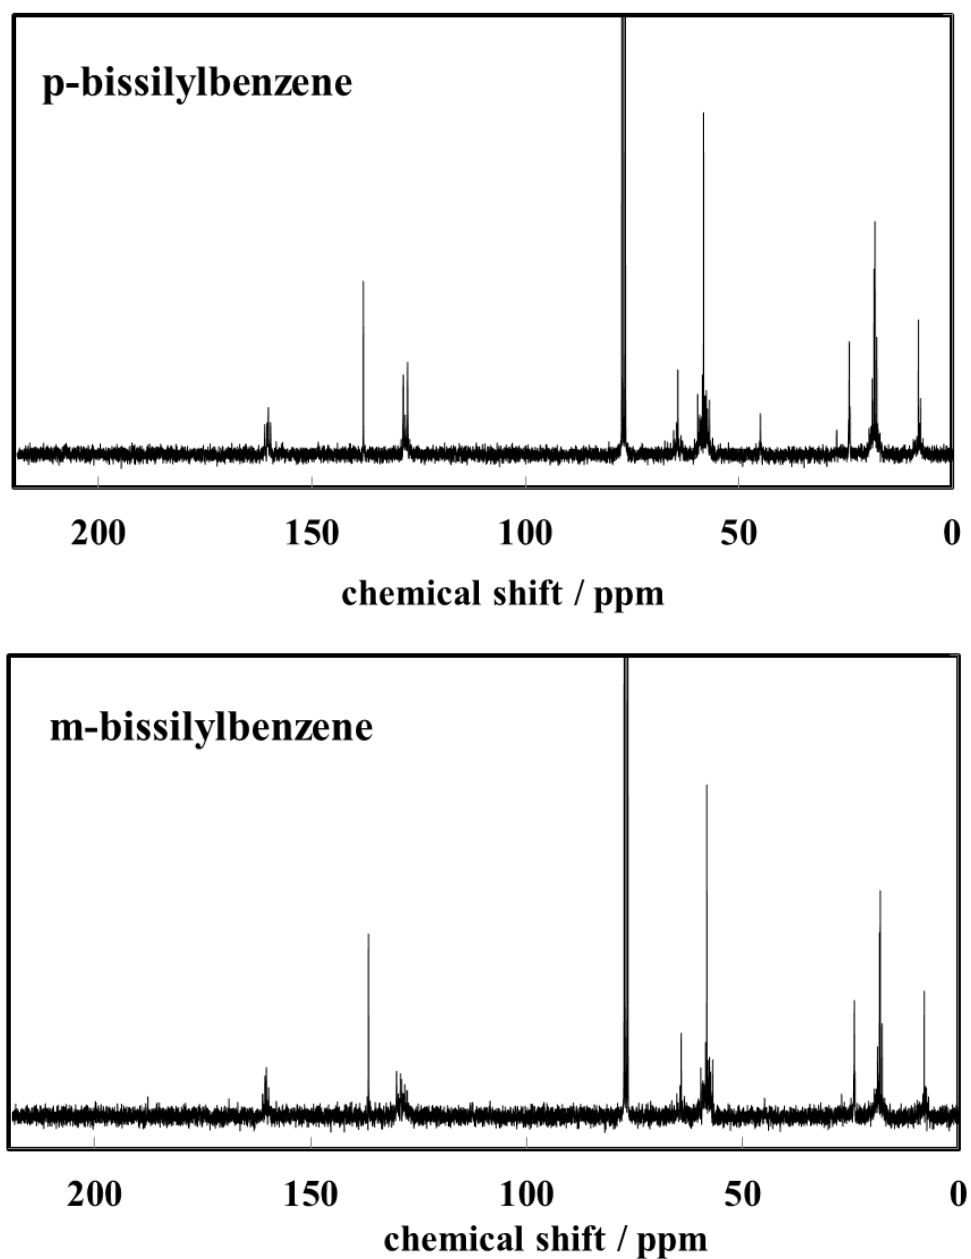

**Fig. S2**  $^{13}\text{C}$ -CP MAS NMR spectra of m- and p-bis-(3-iminopropyltriethoxysilyl) benzene (1,3-di(triethoxysilylpropyl)iminomethylbenzene and 1,4-di(triethoxysilylpropyl)iminomethylbenzene, respectively) in  $\text{CDCl}_3$ .
